# Supplementary material
Source: publisher figshare collection journal article supplement (https://acs.figshare.com/ndownloader/files/5741700)
Supplement: Supplementary file 1 [file 5741700]

data_anti-5h
#-----------------------------------------------------------------------------
_audit_creation_date                  'Tue Feb 25 13:40:47 2003'
_audit_creation_method                'by teXsan'
_audit_update_record                   ?
#-----------------------------------------------------------------------------
# PROCESSING SUMMARY (IUCr Office Use Only) 
_journal_date_recd_electronic          ?
_journal_date_from_coeditor            ?
_journal_date_accepted                 ?
_journal_coeditor_code                 ?
#-----------------------------------------------------------------------------
# SUBMISSION DETAILS 
_publ_contact_author_name             ' ENTER NAME'
_publ_contact_author_address
;
    ENTER ADDRESS
;
_publ_contact_author_email            ' ENTER EMAIL ADDRESS '
_publ_contact_author_fax              ' ENTER FAX NUMBER '
_publ_contact_author_phone            ' ENTER PHONE NUMBER '
_publ_contact_letter
;
    ENTER TEXT OF LETTER
;
_publ_requested_journal               ' ENTER JOURNAL NAME HERE'
_publ_requested_category              ' CHOOSE FI FM FO CI CM CO or AD'

_publ_requested_coeditor_name          ?
#-----------------------------------------------------------------------------
# TITLE AND AUTHOR LIST 

_publ_section_title
;
    ENTER SECTION TITLE
;

_publ_section_title_footnote
;
    ENTER FOOTNOTE TO TITLE OF PAPER
;
loop_
_publ_author_name
_publ_author_footnote
_publ_author_address
' FIRST AUTHORS NAME '
;
  FIRST AUTHORS FOOTNOTES
;
;
  FIRST AUTHORS ADDRESS
;
_publ_section_synopsis
;
  ENTER SYNOPSIS
;
#-----------------------------------------------------------------------------
# TEXT 

_publ_section_abstract
;
    ENTER ABSTRACT
;

_publ_section_comment
;
The compound crystallizes as large colorless blocks from a chloroform / hexane
solution.  There are four molecules of the compound in the unit cell of the
acentric, primitive orthorhombic space group P2$_1$2$_1$2$_1$.  The correct
handedness of the molecule and enatiomorph of the sapce group were determined
by comparison of the known handedness at C5 and C7 with that observed in the
model.  The correct relative stereochemistry is shown in the Figures.

The structure of the molecule is as anticipated.  There is an intermolecular
hydrogen-bond from the sylfonamide nitrogen, N1 to the hydroxyl oxygen O2 of an
adjacent molecule (N1 ... O2' distance = 3.07 /AA (see Tables of Intermoleculer
Contacts).  This results in the formation of linear chains of H-bonded
molecules that run parallel to the $a$-axis in the unit cell.  There is also an
intramolecular H-bond from the hydroxyl to the carbonyl (O2 ... O1 distance =
2.78 /AA).

No unusual bond lengths or angles were observed within the molecule.

;

_publ_section_acknowledgements
;
    ENTER ACKNOWLEDGEMENTS
;

_publ_section_references
;
    ENTER OTHER REFERENCES
SIR97: Altomare, A., Burla, M. C., Camalli, M., Cascarano, G., Giacovazzo, C., Guagliardi, A., Moliterni, A. G. G., Polidori, G., & Spagna, R. 
SIR97: A new tool for crystal structure determination and refinement. J. App. Cryst. (1998) 

SMART v5.052d: Area-Detector Software Package, 
Bruker Analytical X-ray Systems, Inc.: Madison, WI, (1995-99)

SAINT: SAX Area-Dectector Integration Program, V5.04; 
Siemens Industrial Automation, Inc.: Madison, WI, (1995)

teXsan: Crystal Structure Analysis Package, Molecular Structure Corporation,
(1985 & 1992). 

;

_publ_section_figure_captions
;
    ENTER FIGURE CAPTIONS
;

_publ_section_exptl_prep
;
    ENTER COMPOUND PREPARATION DETAILS
;

_publ_section_exptl_refinement
;
    ENTER SPECIAL DETAILS OF THE REFINEMENT
;
#-----------------------------------------------------------------------------
# CHEMICAL DATA 
_chemical_formula_sum                  'C13 H29 N O2 S '
_chemical_formula_moiety               'C13 H29 N O2 S '
_chemical_formula_weight               263.44
_chemical_melting_point                ?
#-----------------------------------------------------------------------------
# CRYSTAL DATA 
_symmetry_cell_setting                 orthorhombic
_symmetry_space_group_name_H-M        'P 21 21 21 '
_symmetry_Int_Tables_number            19
loop_
_symmetry_equiv_pos_as_xyz
x,y,z
1/2-x,-y,1/2+z
1/2+x,1/2-y,-z
-x,1/2+y,1/2-z
_cell_length_a                         9.389(1)
_cell_length_b                         10.800(1)
_cell_length_c                         16.087(2)
_cell_angle_alpha                      90
_cell_angle_beta                       90
_cell_angle_gamma                      90
_cell_volume                           1631.3(3)
_cell_formula_units_Z                  4
_cell_measurement_reflns_used          1369
_cell_measurement_theta_min            2.3
_cell_measurement_theta_max            20.1
_cell_measurement_temperature          134.2
#-----------------------------------------------------------------------------
_exptl_crystal_description            'block'
_exptl_crystal_colour                 'colorless'
_exptl_crystal_size_max                0.200
_exptl_crystal_size_mid                0.190
_exptl_crystal_size_min                0.110
_exptl_crystal_size_rad                ?
_exptl_crystal_density_diffrn          1.073
_exptl_crystal_density_meas            ?
_exptl_crystal_density_method         'not measured'
_exptl_crystal_F_000                   584.00
_exptl_absorpt_coefficient_mu          0.192
_exptl_absorpt_correction_type         empirical
_exptl_absorpt_process_details        'Blessing, 1995'
_exptl_absorpt_correction_T_min        0.529
_exptl_absorpt_correction_T_max        0.979
#-----------------------------------------------------------------------------
# EXPERIMENTAL DATA 
_diffrn_radiation_type                'Mo K\a'
_diffrn_radiation_wavelength           0.7107
_diffrn_measurement_device_type       'SMART CCD'
_diffrn_measurement_method             \w-scan
_diffrn_ambient_temperature            134.2
_diffrn_reflns_number                  2718
_diffrn_reflns_av_R_equivalents        0.049
_diffrn_reflns_theta_min               1.89
_diffrn_reflns_theta_max               24.70
_diffrn_measured_fraction_theta_max    1.6816
_diffrn_reflns_theta_full              24.70
_diffrn_measured_fraction_theta_full   1.6816
_diffrn_reflns_limit_h_min             0
_diffrn_reflns_limit_h_max             10
_diffrn_reflns_limit_k_min             0
_diffrn_reflns_limit_k_max             12
_diffrn_reflns_limit_l_min             -18
_diffrn_reflns_limit_l_max             18
_diffrn_standards_number               ?
_diffrn_standards_interval_count       ?
_diffrn_standards_decay_%              ?
#-----------------------------------------------------------------------------
# REFINEMENT DATA 
_refine_special_details
;
Refinement using reflections with F^2^ > 3.0 sigma(F^2^). The weighted R-factor
(wR), goodness of fit (S) and R-factor (gt) are based on F, with F set to zero 
for negative F. The threshold expression of F^2^ > 3.0 sigma(F^2^) is used only 
for calculating R-factor (gt).
;
_atom_sites_solution_primary           direct
_reflns_number_total                   2699
_reflns_number_gt                      1519
_reflns_threshold_expression           F^2^>3.0\s(F^2^)
_refine_ls_structure_factor_coef       F
_refine_ls_R_factor_gt                 0.0522
_refine_ls_wR_factor_gt                0.0550
_refine_ls_R_factor_all                0.1080
_refine_ls_wR_factor_ref               0.0625
_refine_ls_hydrogen_treatment          noref
_refine_ls_matrix_type                 full
_refine_ls_number_reflns               1519
_refine_ls_number_parameters           154
_refine_ls_number_restraints           0
_refine_ls_goodness_of_fit_ref         1.712
_refine_ls_weighting_scheme            calc
_refine_ls_weighting_details
   'w = 1/[\s^2^(Fo) + 0.00022|Fo|^2^]'
_refine_ls_shift/su_max                0.0054
_refine_diff_density_max               0.29
_refine_diff_density_min               -0.25
_refine_ls_extinction_method           none
_refine_ls_extinction_coef             ?
_refine_ls_abs_structure_details       ?
_refine_ls_abs_structure_Flack         ?
#-----------------------------------------------------------------------------
# COMPUTATION AND REFINEMENT PROGRAMS 
_computing_data_collection            'Bruker SMART v5.0'
_computing_cell_refinement            'Bruker SAINT v5.04'
_computing_data_reduction             'Bruker SAINT v5.04'
_computing_structure_solution          'SIR97'
_computing_structure_refinement       'teXsan'
_computing_publication_material       'teXsan'
_computing_molecular_graphics          ?
#-----------------------------------------------------------------------------
loop_
_atom_type_symbol
_atom_type_description
_atom_type_scat_dispersion_real
_atom_type_scat_dispersion_imag
_atom_type_scat_source
  'S' 'S'  0.125 0.123 
;International Tables for Crystallography
(1992, Vol. C, Tables 4.2.6.8 and 6.1.1.1)
;
  'O' 'O'  0.011 0.006 
;International Tables for Crystallography
(1992, Vol. C, Tables 4.2.6.8 and 6.1.1.1)
;
  'N' 'N'  0.006 0.003 
;International Tables for Crystallography
(1992, Vol. C, Tables 4.2.6.8 and 6.1.1.1)
;
  'C' 'C'  0.003 0.002 
;International Tables for Crystallography
(1992, Vol. C, Tables 4.2.6.8 and 6.1.1.1)
;
  'H' 'H'  0.000 0.000 
;International Tables for Crystallography
(1992, Vol. C, Table 6.1.1.2)
;
#-----------------------------------------------------------------------------
# ATOMIC COORDINATES AND DISPLACEMENT PARAMETERS 
loop_ 
_atom_site_label 
_atom_site_type_symbol 
_atom_site_fract_x 
_atom_site_fract_y 
_atom_site_fract_z 
_atom_site_U_iso_or_equiv 
_atom_site_adp_type 
_atom_site_occupancy 
_atom_site_calc_flag 
_atom_site_refinement_flags 
_atom_site_disorder_assembly 
_atom_site_disorder_group 
 S1     S  -0.0547(2)  0.1302(1)   0.13812(9)  0.0305(4)   Uani 1.00 d . . .
 O1     O  -0.1017(3)  0.2637(3)   0.1369(2)   0.037(1)    Uani 1.00 d . . .
 O2     O  -0.1370(4)  0.3302(3)   -0.0288(2)  0.029(1)    Uani 1.00 d . . .
 N1     N  0.0517(5)   0.0968(4)   0.0589(2)   0.021(1)    Uani 1.00 d . . .
 C1     C  0.0741(6)   0.1220(5)   0.2237(3)   0.026(2)    Uani 1.00 d . . .
 C2     C  -0.0169(6)  0.1258(6)   0.3017(3)   0.042(2)    Uani 1.00 d . . .
 C3     C  0.1723(6)   0.2328(5)   0.2205(3)   0.031(2)    Uani 1.00 d . . .
 C4     C  0.1550(7)   -0.0008(5)  0.2177(3)   0.037(2)    Uani 1.00 d . . .
 C5     C  -0.0186(5)  0.0759(5)   -0.0211(3)  0.023(2)    Uani 1.00 d . . .
 C6     C  0.0250(5)   0.1739(5)   -0.0844(3)  0.023(2)    Uani 1.00 d . . .
 C7     C  0.0056(6)   0.3066(5)   -0.0573(4)  0.026(2)    Uani 1.00 d . . .
 C8     C  0.0371(6)   0.3956(5)   -0.1277(4)  0.037(2)    Uani 1.00 d . . .
 C9     C  0.0327(8)   0.5320(6)   -0.1032(4)  0.060(3)    Uani 1.00 d . . .
 C10    C  0.0039(6)   -0.0606(5)  -0.0503(4)  0.027(2)    Uani 1.00 d . . .
 C11    C  -0.0650(7)  -0.1455(5)  0.0121(4)   0.050(2)    Uani 1.00 d . . .
 C12    C  0.1627(7)   -0.0904(5)  -0.0559(4)  0.039(2)    Uani 1.00 d . . .
 C13    C  -0.0645(7)  -0.0774(5)  -0.1358(4)  0.051(2)    Uani 1.00 d . . .
 H1     H  -0.0724     0.1993      0.3018      0.0498      Uiso 1.00 calc . . .
 H2     H  -0.0780     0.0557      0.3028      0.0498      Uiso 1.00 calc . . .
 H3     H  0.0430      0.1247      0.3493      0.0498      Uiso 1.00 calc . . .
 H4     H  0.2347      0.2312      0.2670      0.0366      Uiso 1.00 calc . . .
 H5     H  0.2266      0.2303      0.1707      0.0366      Uiso 1.00 calc . . .
 H6     H  0.1175      0.3067      0.2218      0.0366      Uiso 1.00 calc . . .
 H7     H  0.0889      -0.0674     0.2174      0.0445      Uiso 1.00 calc . . .
 H8     H  0.2091      -0.0021     0.1679      0.0445      Uiso 1.00 calc . . .
 H9     H  0.2169      -0.0088     0.2641      0.0445      Uiso 1.00 calc . . .
 H10    H  -0.1179     0.0860      -0.0119     0.0282      Uiso 1.00 calc . . .
 H11    H  0.1230      0.1620      -0.0968     0.0275      Uiso 1.00 calc . . .
 H12    H  -0.0300     0.1615      -0.1332     0.0275      Uiso 1.00 calc . . .
 H13    H  0.0698      0.3232      -0.0130     0.0314      Uiso 1.00 calc . . .
 H14    H  0.1294      0.3777      -0.1486     0.0446      Uiso 1.00 calc . . .
 H15    H  -0.0314     0.3825      -0.1703     0.0446      Uiso 1.00 calc . . .
 H16    H  0.1043      0.5480      -0.0629     0.0718      Uiso 1.00 calc . . .
 H17    H  0.0494      0.5818      -0.1509     0.0718      Uiso 1.00 calc . . .
 H18    H  -0.0581     0.5512      -0.0806     0.0718      Uiso 1.00 calc . . .
 H19    H  -0.1516     -0.1097     0.0311      0.0597      Uiso 1.00 calc . . .
 H20    H  -0.0843     -0.2231     -0.0132     0.0597      Uiso 1.00 calc . . .
 H21    H  -0.0026     -0.1571     0.0580      0.0597      Uiso 1.00 calc . . .
 H22    H  0.1885      -0.1440     -0.0116     0.0467      Uiso 1.00 calc . . .
 H23    H  0.1821      -0.1299     -0.1075     0.0467      Uiso 1.00 calc . . .
 H24    H  0.2162      -0.0160     -0.0523     0.0467      Uiso 1.00 calc . . .
 H25    H  -0.0748     0.0010      -0.1618     0.0605      Uiso 1.00 calc . . .
 H26    H  -0.0055     -0.1289     -0.1691     0.0605      Uiso 1.00 calc . . .
 H27    H  -0.1553     -0.1149     -0.1296     0.0605      Uiso 1.00 calc . . .
 H28    H  0.1403      0.1398      0.0552      0.0515      Uiso 1.00 calc . . .
 H29    H  -0.1607     0.2796      0.0033      0.0515      Uiso 1.00 calc . . .

loop_ 
_atom_site_aniso_label 
_atom_site_aniso_U_11 
_atom_site_aniso_U_22 
_atom_site_aniso_U_33 
_atom_site_aniso_U_12 
_atom_site_aniso_U_13 
_atom_site_aniso_U_23 
 S1     0.0221(7)   0.0409(10)  0.0287(9)   0.0002(9)   0.0039(8)   -0.0080(9) 
 O1     0.035(2)    0.040(3)    0.036(2)    0.021(2)    -0.003(2)   -0.008(2)  
 O2     0.020(2)    0.024(3)    0.044(3)    0.006(2)    -0.001(2)   0.001(2)   
 N1     0.017(2)    0.031(3)    0.016(3)    0.004(3)    0.007(2)    -0.007(2)  
 C1     0.037(4)    0.024(3)    0.018(3)    -0.002(4)   -0.004(3)   0.003(3)   
 C2     0.047(4)    0.047(4)    0.031(4)    -0.011(4)   0.006(3)    -0.001(3)  
 C3     0.029(4)    0.032(4)    0.031(4)    -0.002(3)   -0.007(3)   0.001(3)   
 C4     0.045(4)    0.028(4)    0.039(4)    0.000(4)    0.009(4)    0.001(3)   
 C5     0.014(3)    0.035(4)    0.022(3)    0.003(3)    0.004(3)    -0.006(3)  
 C6     0.009(3)    0.031(4)    0.028(3)    0.000(3)    -0.007(3)   -0.007(3)  
 C7     0.015(4)    0.033(4)    0.031(4)    -0.002(3)   -0.005(3)   0.001(3)   
 C8     0.027(3)    0.030(4)    0.054(4)    0.002(3)    -0.002(4)   0.007(3)   
 C9     0.050(5)    0.039(4)    0.091(6)    -0.006(4)   -0.007(5)   0.007(4)   
 C10    0.025(4)    0.021(4)    0.036(4)    -0.003(3)   -0.003(3)   -0.012(3)  
 C11    0.054(4)    0.027(4)    0.069(5)    -0.004(4)   0.014(4)    -0.005(4)  
 C12    0.052(4)    0.026(4)    0.038(4)    0.017(3)    0.010(4)    0.000(3)   
 C13    0.066(4)    0.032(4)    0.054(4)    0.003(4)    -0.022(5)   -0.018(4)  
 
_geom_special_details
;
 ?
;
loop_ 
_geom_bond_atom_site_label_1 
_geom_bond_atom_site_label_2 
_geom_bond_distance 
_geom_bond_site_symmetry_1 
_geom_bond_site_symmetry_2 
_geom_bond_publ_flag 
 S1        O1        1.508(3)   . . yes  
 S1        N1        1.659(4)   . . yes  
 S1        C1        1.835(5)   . . yes  
 O2        C7        1.438(6)   . . yes  
 N1        C5        1.465(6)   . . yes  
 C1        C2        1.518(7)   . . yes  
 C1        C3        1.512(7)   . . yes  
 C1        C4        1.531(8)   . . yes  
 C5        C6        1.524(7)   . . yes  
 C5        C10       1.561(7)   . . yes  
 C6        C7        1.509(7)   . . yes  
 C7        C8        1.515(7)   . . yes  
 C8        C9        1.525(8)   . . yes  
 C10       C11       1.506(8)   . . yes  
 C10       C12       1.529(8)   . . yes  
 C10       C13       1.528(8)   . . yes  
 
loop_ 
_geom_angle_atom_site_label_1 
_geom_angle_atom_site_label_2 
_geom_angle_atom_site_label_3 
_geom_angle 
_geom_angle_site_symmetry_1 
_geom_angle_site_symmetry_2 
_geom_angle_site_symmetry_3 
_geom_angle_publ_flag 
 O1        S1        N1        112.0(2)   . . . ? 
 O1        S1        C1        104.4(2)   . . . ? 
 N1        S1        C1        99.7(2)    . . . ? 
 S1        N1        C5        115.9(3)   . . . ? 
 S1        C1        C2        104.4(4)   . . . ? 
 S1        C1        C3        109.7(4)   . . . ? 
 S1        C1        C4        108.8(4)   . . . ? 
 C2        C1        C3        110.5(5)   . . . ? 
 C2        C1        C4        110.8(5)   . . . ? 
 C3        C1        C4        112.4(5)   . . . ? 
 N1        C5        C6        111.0(4)   . . . ? 
 N1        C5        C10       110.4(4)   . . . ? 
 C6        C5        C10       114.7(4)   . . . ? 
 C5        C6        C7        115.7(4)   . . . ? 
 O2        C7        C6        111.9(4)   . . . ? 
 O2        C7        C8        107.9(5)   . . . ? 
 C6        C7        C8        111.3(5)   . . . ? 
 C7        C8        C9        114.4(5)   . . . ? 
 C5        C10       C11       108.5(4)   . . . ? 
 C5        C10       C12       110.4(4)   . . . ? 
 C5        C10       C13       109.0(5)   . . . ? 
 C11       C10       C12       109.3(5)   . . . ? 
 C11       C10       C13       110.3(5)   . . . ? 
 C12       C10       C13       109.4(5)   . . . ? 
 
loop_ 
_geom_torsion_atom_site_label_1 
_geom_torsion_atom_site_label_2 
_geom_torsion_atom_site_label_3 
_geom_torsion_atom_site_label_4 
_geom_torsion
_geom_torsion_site_symmetry_1 
_geom_torsion_site_symmetry_2 
_geom_torsion_site_symmetry_3 
_geom_torsion_site_symmetry_4 
_geom_torsion_publ_flag
 S1        N1        C5        C6        115.9(4)   . . . . ? 
 S1        N1        C5        C10       -115.6(4)  . . . . ? 
 O1        S1        N1        C5        -79.0(4)   . . . . ? 
 O1        S1        C1        C2        75.1(4)    . . . . ? 
 O1        S1        C1        C3        -43.3(4)   . . . . ? 
 O1        S1        C1        C4        -166.6(4)  . . . . ? 
 O2        C7        C6        C5        -53.1(6)   . . . . ? 
 O2        C7        C8        C9        62.1(6)    . . . . ? 
 N1        S1        C1        C2        -169.1(4)  . . . . ? 
 N1        S1        C1        C3        72.5(4)    . . . . ? 
 N1        S1        C1        C4        -50.8(4)   . . . . ? 
 N1        C5        C6        C7        -53.4(6)   . . . . ? 
 N1        C5        C10       C11       62.6(5)    . . . . ? 
 N1        C5        C10       C12       -57.1(6)   . . . . ? 
 N1        C5        C10       C13       -177.3(5)  . . . . ? 
 C1        S1        N1        C5        171.1(4)   . . . . ? 
 C5        C6        C7        C8        -173.9(5)  . . . . ? 
 C6        C5        C10       C11       -171.0(5)  . . . . ? 
 C6        C5        C10       C12       69.3(6)    . . . . ? 
 C6        C5        C10       C13       -50.9(6)   . . . . ? 
 C6        C7        C8        C9        -174.8(4)  . . . . ? 
 C7        C6        C5        C10       -179.5(4)  . . . . ? 
 
loop_
_geom_contact_atom_site_label_1 
_geom_contact_atom_site_label_2 
_geom_contact_distance 
_geom_contact_site_symmetry_1 
_geom_contact_site_symmetry_2 
_geom_contact_publ_flag 
 O1        C4        3.491(7)   . 4_555 ? 
 O2        N1        3.066(6)   . 3_455 ? 
 O1        O2        2.780(5)   . . ? 
 
